# Supplementary material
Source: PubMed Central journal article supplement (PMC2783801)
Supplement: NIHMS117019-supplement-01.pdf [file NIHMS117019-supplement-01.pdf]

Supplementary tables for Part I of Boyce *et al* “A biomedical evidence taxonomy oriented toward confidence assignment”

Table 3: The distribution of evidence types among evidence items used to *support* drug mechanism assertions.

| Qualitative assertion types                                     |            |          |                |                                   |          |               |
|-----------------------------------------------------------------|------------|----------|----------------|-----------------------------------|----------|---------------|
| Assertion type                                                  | Assertions | Defaults | Evidence Items | Percent of evidence items by type |          |               |
|                                                                 |            |          |                | clinical trial                    | in vitro | non-traceable |
| increases-auc                                                   | 41         | 0        | 43             | 93                                | 0        | 7             |
| substrate-of                                                    | 28         | 0        | 29             | 31                                | 48       | 21            |
| has-metabolite                                                  | 20         | 0        | 27             | 19                                | 37       | 44            |
| controls-formation-of                                           | 16         | 0        | 17             | 0                                 | 94       | 6             |
| primary-total-clearance-enzyme                                  | 12         | 4        | 12             | 58                                | 0        | 42            |
| inhibits                                                        | 11         | 0        | 11             | 91                                | 0        | 9             |
| primary-total-clearance-mechanism                               | 10         | 0        | 14             | 21                                | 0        | 79            |
| does-not-permanently-deactivate-catalytic-function <sup>0</sup> | 8          | 8        | 0              | 0                                 | 0        | 0             |
| in-vitro-selective-inhibitor-of-enzyme                          | 8          | 8        | 8              | 0                                 | 0        | 100           |
| in-vitro-probe-substrate-of-enzyme                              | 5          | 5        | 5              | 0                                 | 20       | 80            |
| sole-PK-effect-alter-metabolic-clearance                        | 5          | 5        | 0              | 0                                 | 0        | 0             |
| polymorphic-enzyme                                              | 4          | 4        | 0              | 0                                 | 0        | 0             |
| in-viVo-selective-inhibitor-of-enzyme                           | 4          | 4        | 4              | 0                                 | 0        | 100           |
| primary-metabolic-clearance-enzyme                              | 3          | 0        | 3              | 0                                 | 33       | 67            |
| permanently-deactivates-catalytic-function <sup>0</sup>         | 1          | 1        | 1              | 0                                 | 100      | 0             |
| Total                                                           | 176        | 39       | 174            |                                   |          |               |

| Quantitative assertion types |            |          |                |                                   |          |               |
|------------------------------|------------|----------|----------------|-----------------------------------|----------|---------------|
| Assertion type               | Assertions | Defaults | Evidence Items | Percent of evidence items by type |          |               |
|                              |            |          |                | clinical trial                    | in vitro | non-traceable |
| maximum-concentration        | 11         | 0        | 24             | 67                                | 0        | 33            |
| inhibition-constant          | 9          | 0        | 15             | 0                                 | 100      | 0             |
| bioavailability              | 8          | 0        | 13             | 38                                | 0        | 62            |
| fraction-absorbed            | 2          | 0        | 2              | 100                               | 0        | 0             |
| first-pass-effect            | 1          | 0        | 1              | 0                                 | 0        | 100           |
| Total                        | 31         | 0        | 55             |                                   |          |               |

<sup>0</sup> The inverse assertions `permanently-deactivates-catalytic-function` and `does-not-permanently-deactivate-catalytic-function` do not share any of the same evidence items so are included in the analysis

Table 4: The distribution of evidence types among evidence items used to *refute* drug mechanism assertions.

| Qualitative assertion types                                     |            |          |                |                                   |          |               |
|-----------------------------------------------------------------|------------|----------|----------------|-----------------------------------|----------|---------------|
| Assertion type                                                  | Assertions | Defaults | Evidence Items | Percent of evidence items by type |          |               |
|                                                                 |            |          |                | clinical trial                    | in vitro | non-traceable |
| increases-auc                                                   | 41         | 0        | 12             | 75                                | 0        | 25            |
| substrate-of                                                    | 28         | 0        | 11             | 0                                 | 91       | 9             |
| has-metabolite                                                  | 20         | 0        | 0              | 0                                 | 0        | 0             |
| controls-formation-of                                           | 16         | 0        | 0              | 0                                 | 0        | 0             |
| primary-total-clearance-enzyme                                  | 12         | 4        | 0              | 0                                 | 0        | 0             |
| inhibits                                                        | 11         | 0        | 4              | 50                                | 50       | 0             |
| primary-total-clearance-mechanism                               | 10         | 0        | 0              | 0                                 | 0        | 0             |
| does-not-permanently-deactivate-catalytic-function <sup>0</sup> | 8          | 8        | 0              | 0                                 | 0        | 0             |
| in-vitro-selective-inhibitor-of-enzyme                          | 8          | 8        | 0              | 0                                 | 0        | 0             |
| in-vitro-probe-substrate-of-enzyme                              | 5          | 5        | 0              | 0                                 | 0        | 0             |
| sole-PK-effect-alter-metabolic-clearance                        | 5          | 5        | 0              | 0                                 | 0        | 0             |
| polymorphic-enzyme                                              | 4          | 4        | 0              | 0                                 | 0        | 0             |
| in-viVo-selective-inhibitor-of-enzyme                           | 4          | 4        | 0              | 0                                 | 0        | 0             |
| primary-metabolic-clearance-enzyme                              | 3          | 0        | 1              | 100                               | 0        | 0             |
| permanently-deactivates-catalytic-function <sup>0</sup>         | 1          | 1        | 0              | 0                                 | 0        | 0             |
| Total                                                           | 176        | 39       | 28             |                                   |          |               |

| Quantitative assertion types |            |          |                |                                   |          |               |
|------------------------------|------------|----------|----------------|-----------------------------------|----------|---------------|
| Assertion type               | Assertions | Defaults | Evidence Items | Percent of evidence items by type |          |               |
|                              |            |          |                | clinical trial                    | in vitro | non-traceable |
| maximum-concentration        | 11         | 0        | 0              | 0                                 | 0        | 0             |
| inhibition-constant          | 9          | 0        | 0              | 0                                 | 0        | 0             |
| bioavailability              | 8          | 0        | 0              | 0                                 | 0        | 0             |
| fraction-absorbed            | 2          | 0        | 0              | 0                                 | 0        | 0             |
| first-pass-effect            | 1          | 0        | 0              | 0                                 | 0        | 0             |
| Total                        | 31         | 0        | 0              |                                   |          |               |

<sup>0</sup> The inverse assertions `permanently-deactivates-catalytic-function` and `does-not-permanently-deactivate-catalytic-function` do not share any of the same evidence items so are included in the analysis
